# Supplementary material for: A genome-wide perspective about the diversity and demographic history of seven Spanish goat breeds
Source: PubMed Central journal article supplement (PMC4960707; doi:10.1186/s12711-016-0229-6), 2016-07-25

Figure S2. Admixture analysis ( $K = 2-12$ ) of goats from Spain (Bermeya, Blanca de Rasquera, Malagueña, Murciano-Granadina, Florida and Mallorquina), Tunisia, Burkina Faso (Sahel and Djallonké) and Central East Europe (Carpathian and Saanen).

K= 2

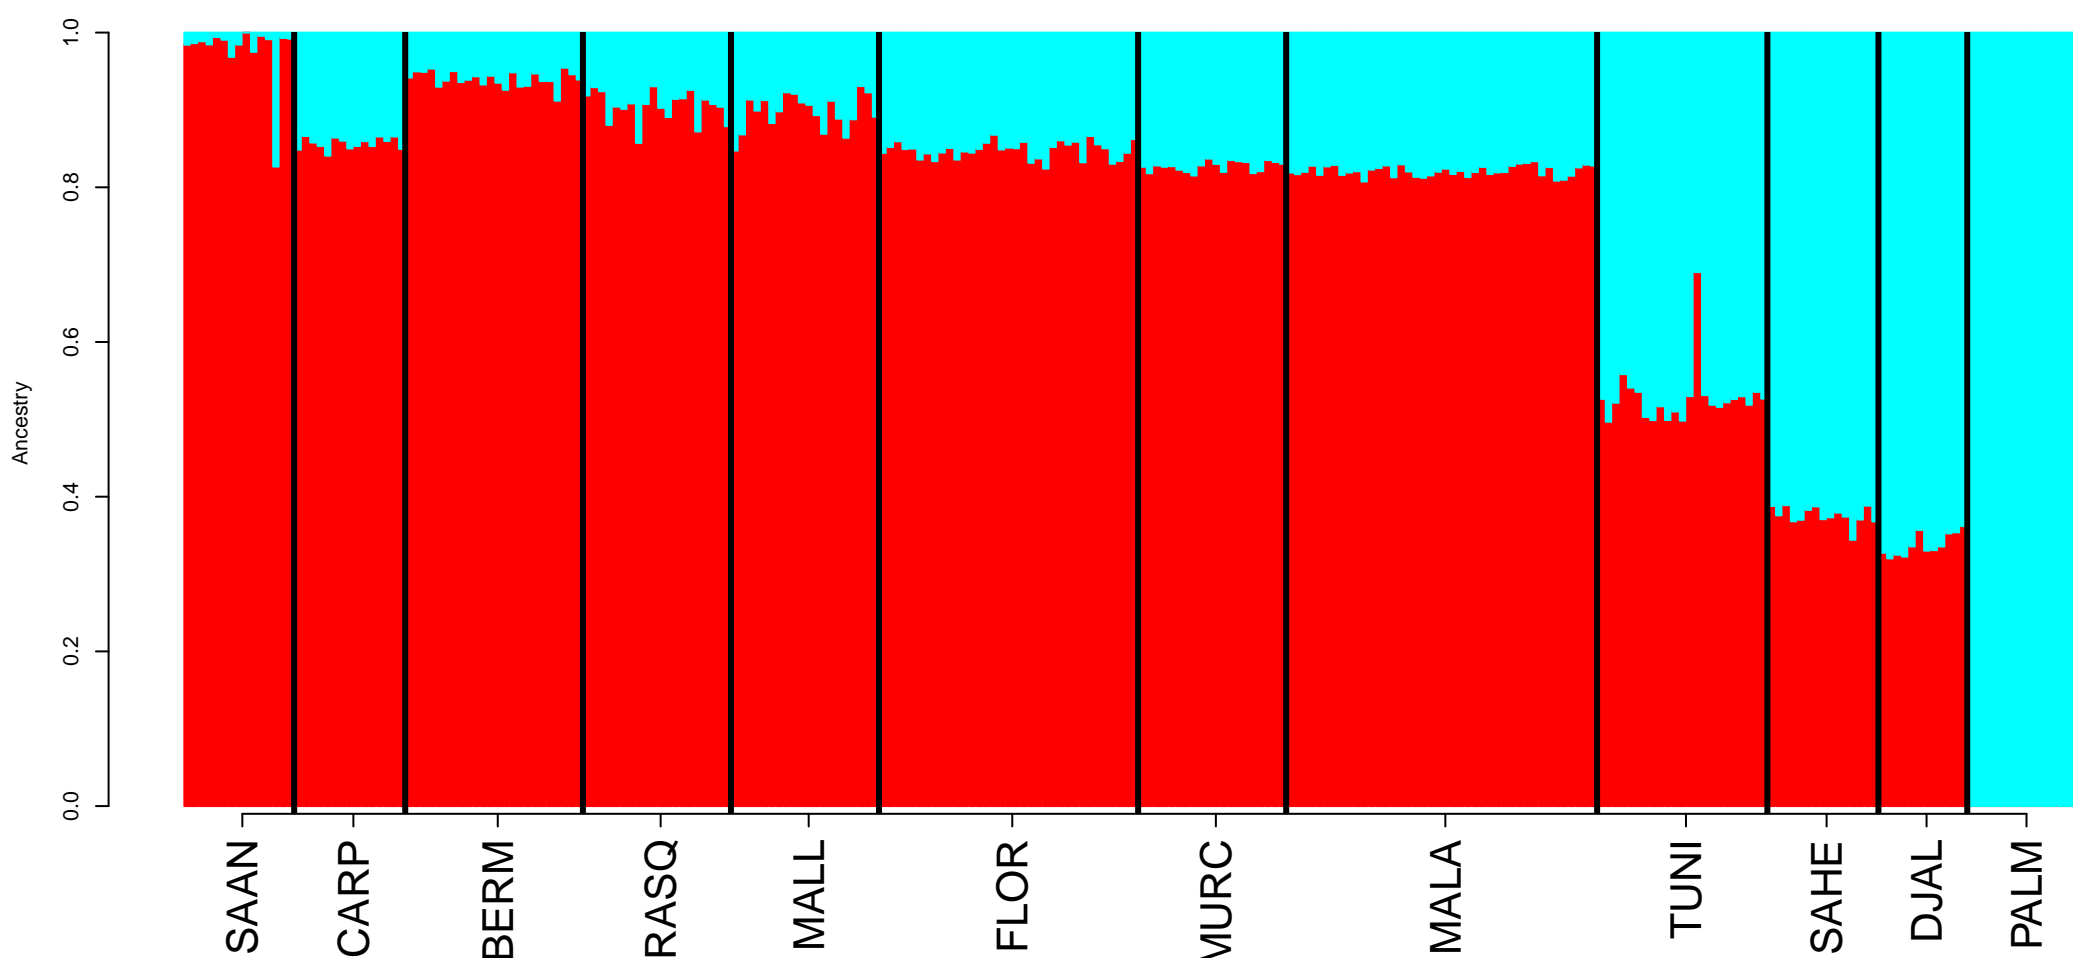

K= 3

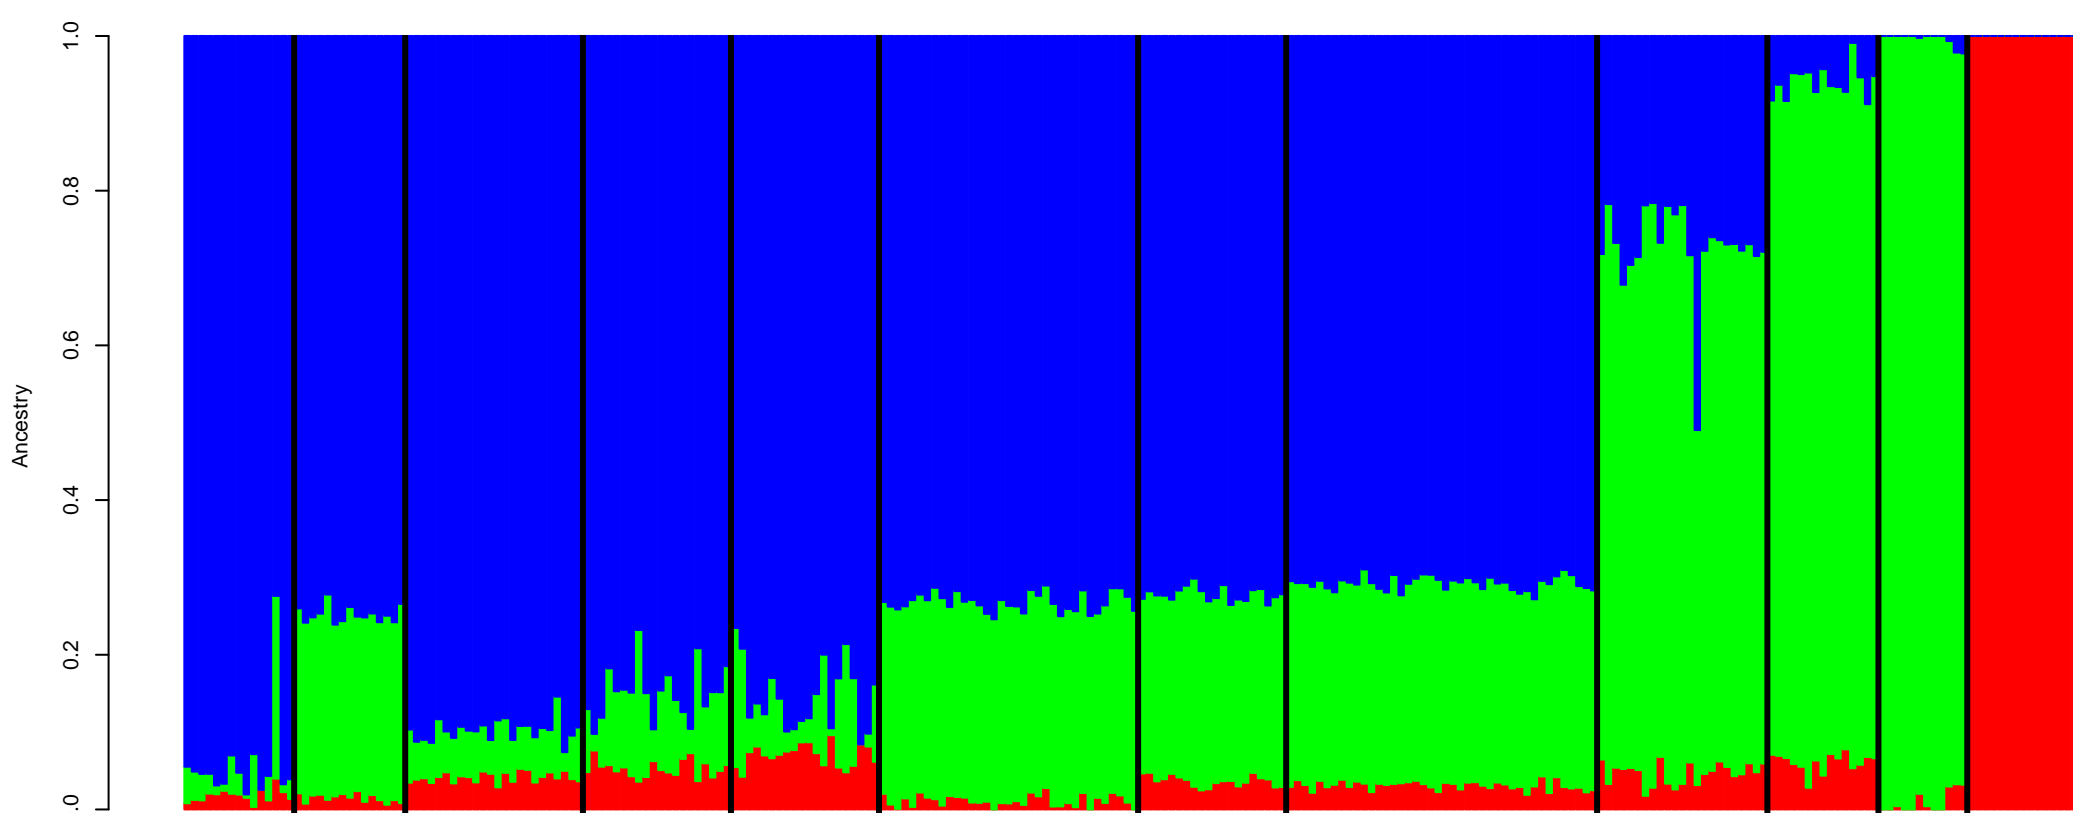

K= 4

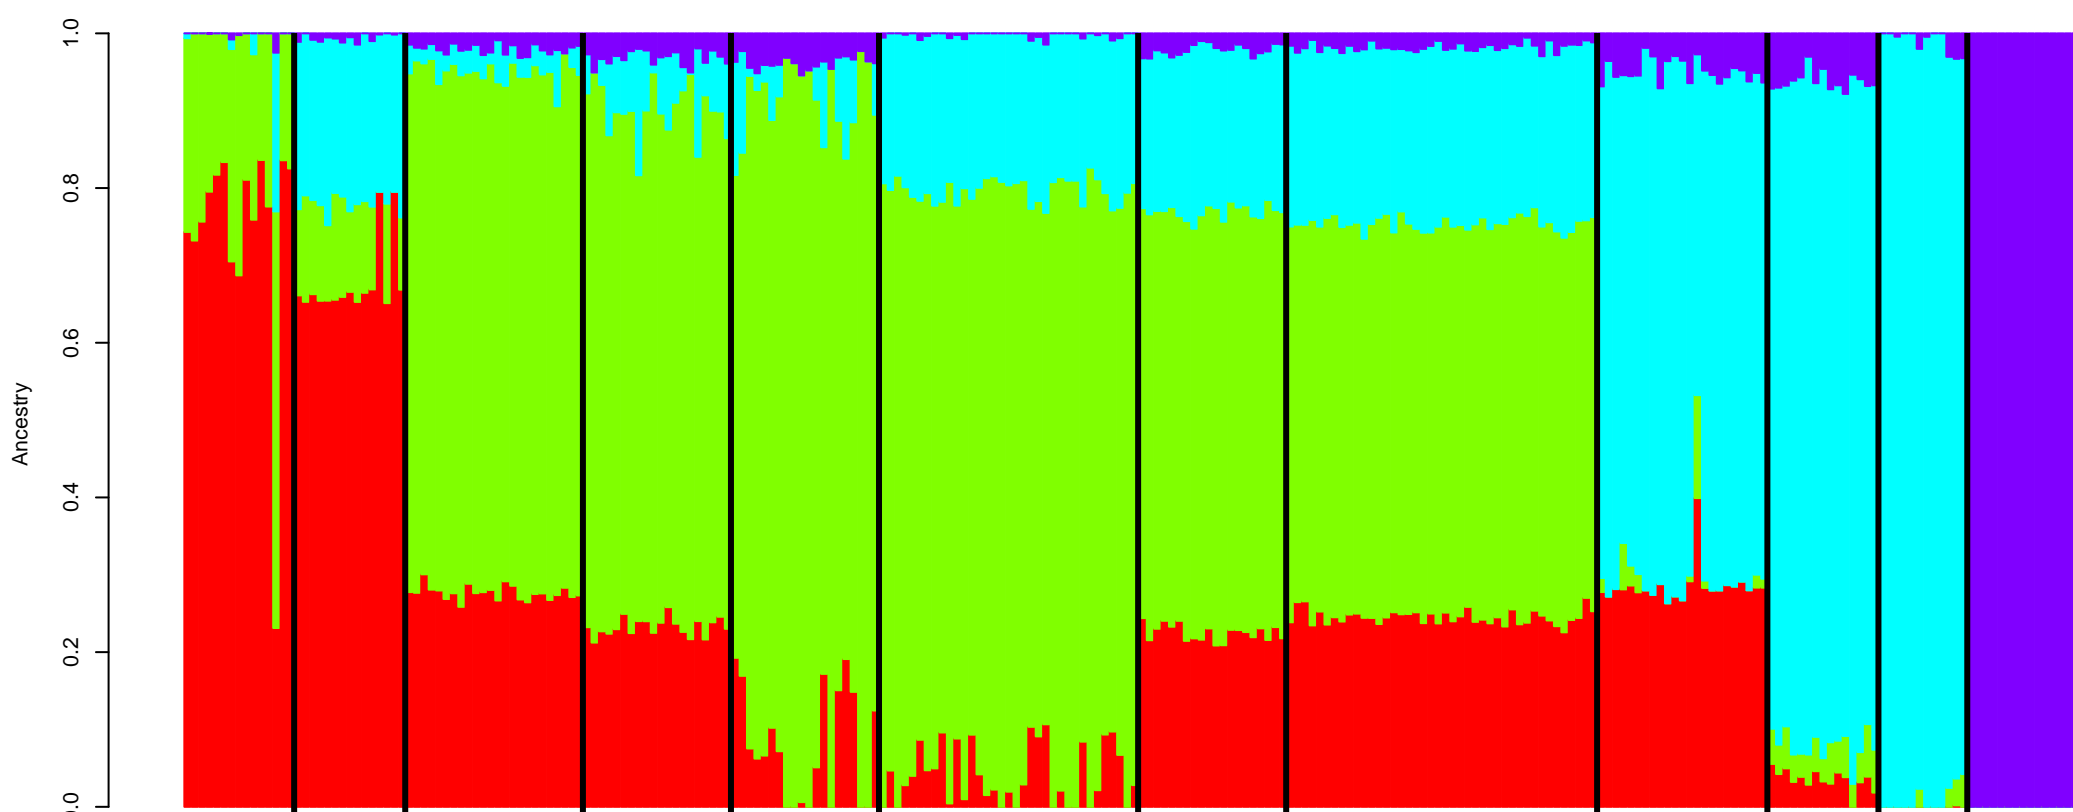

K= 5

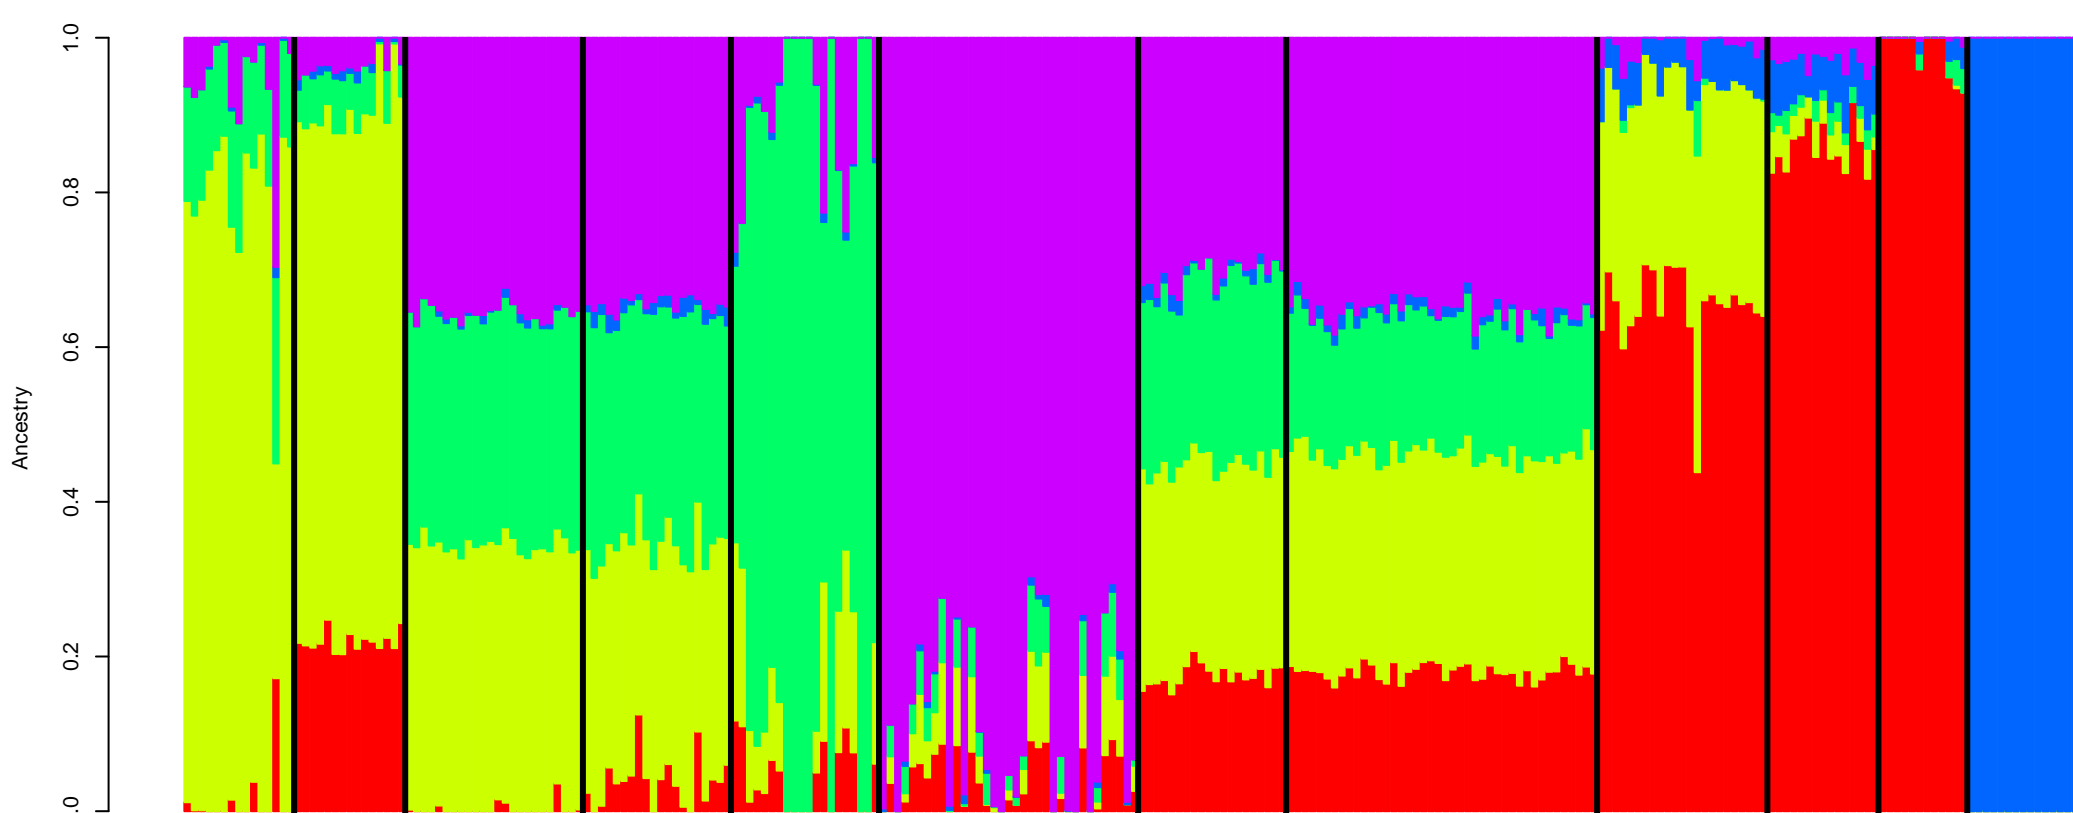

K= 6

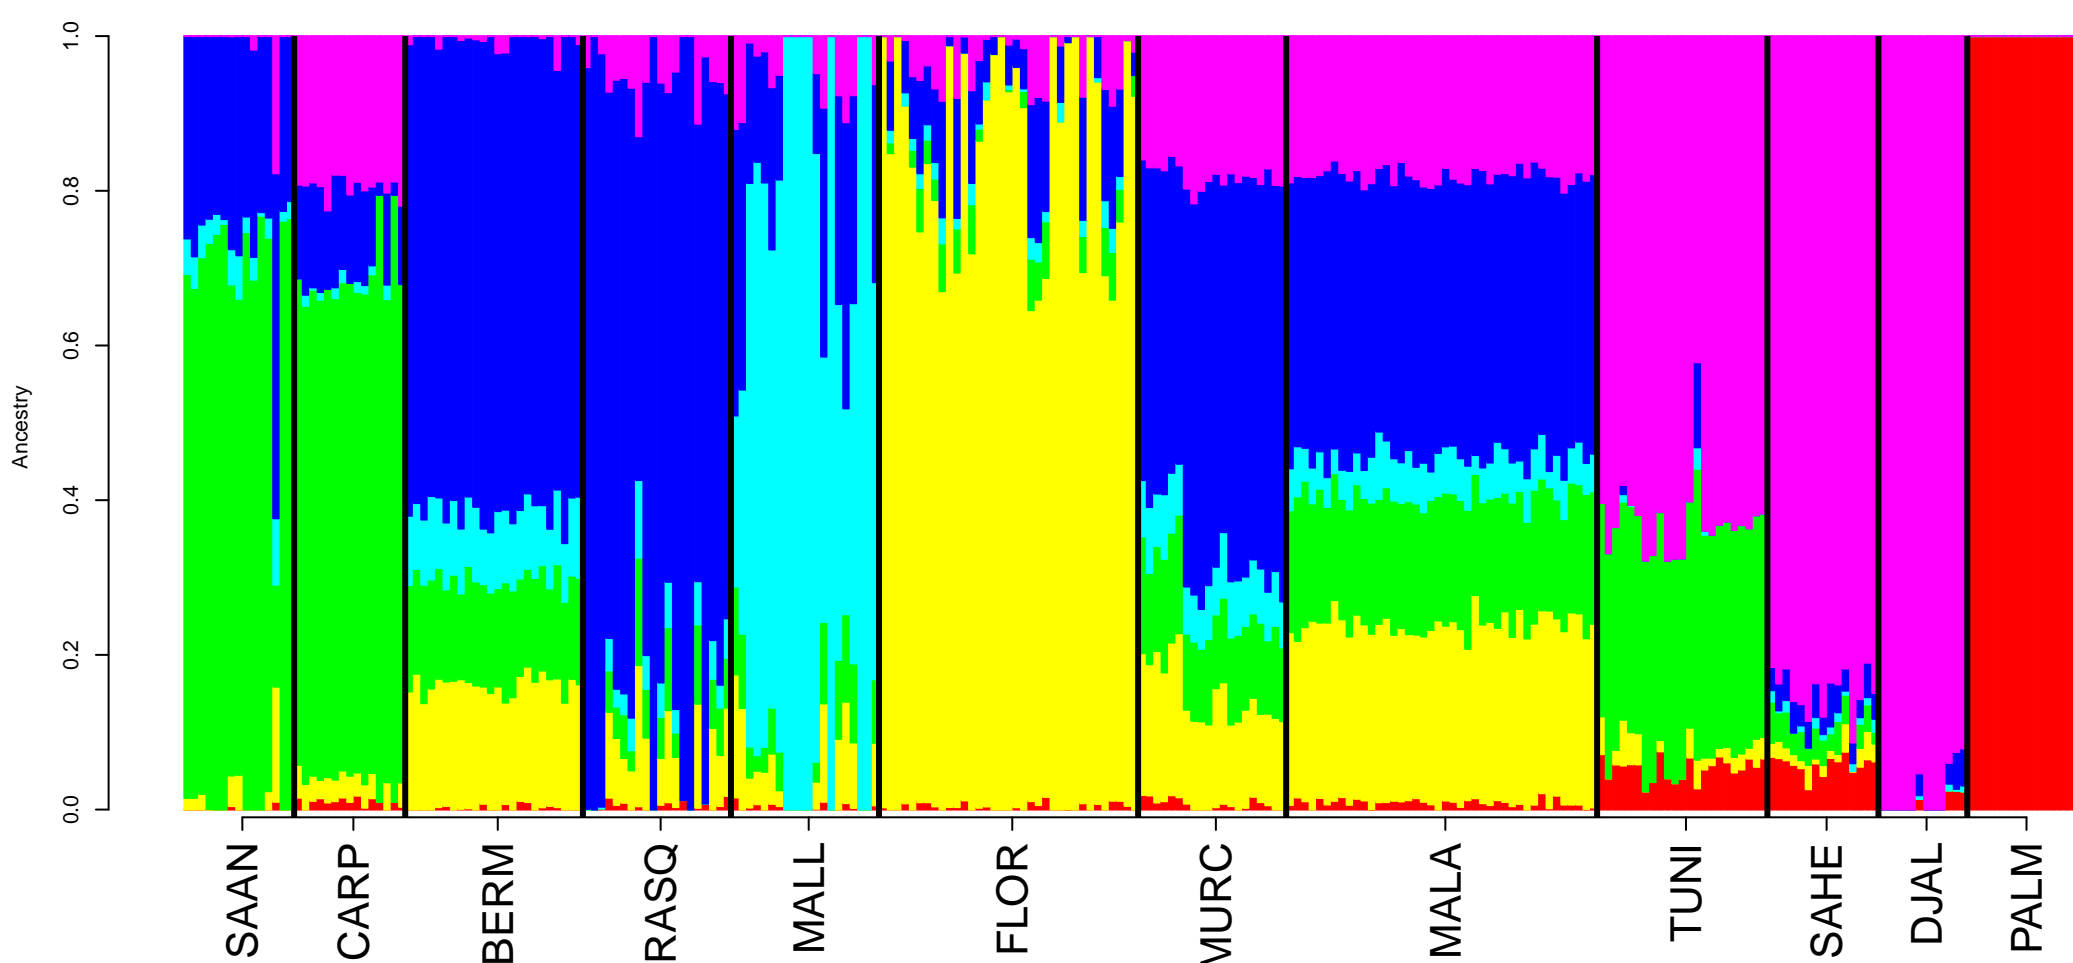

K= 8

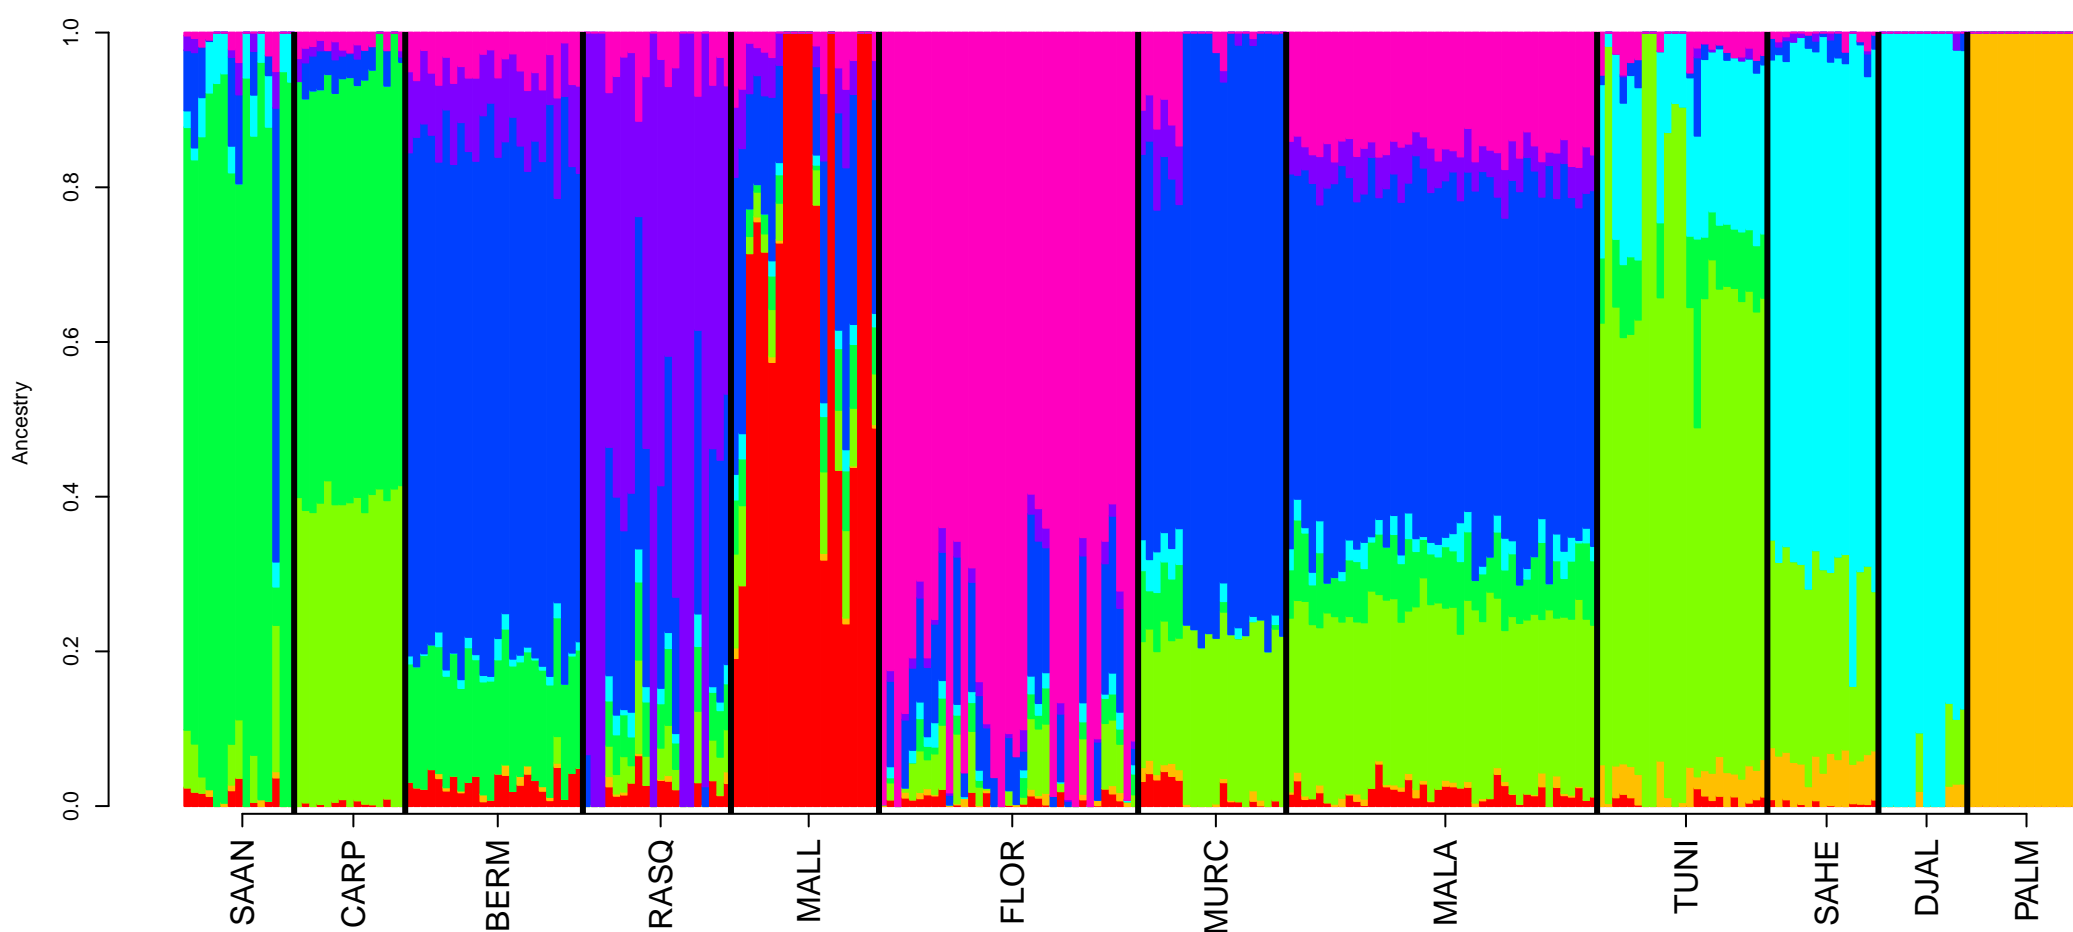

K= 9

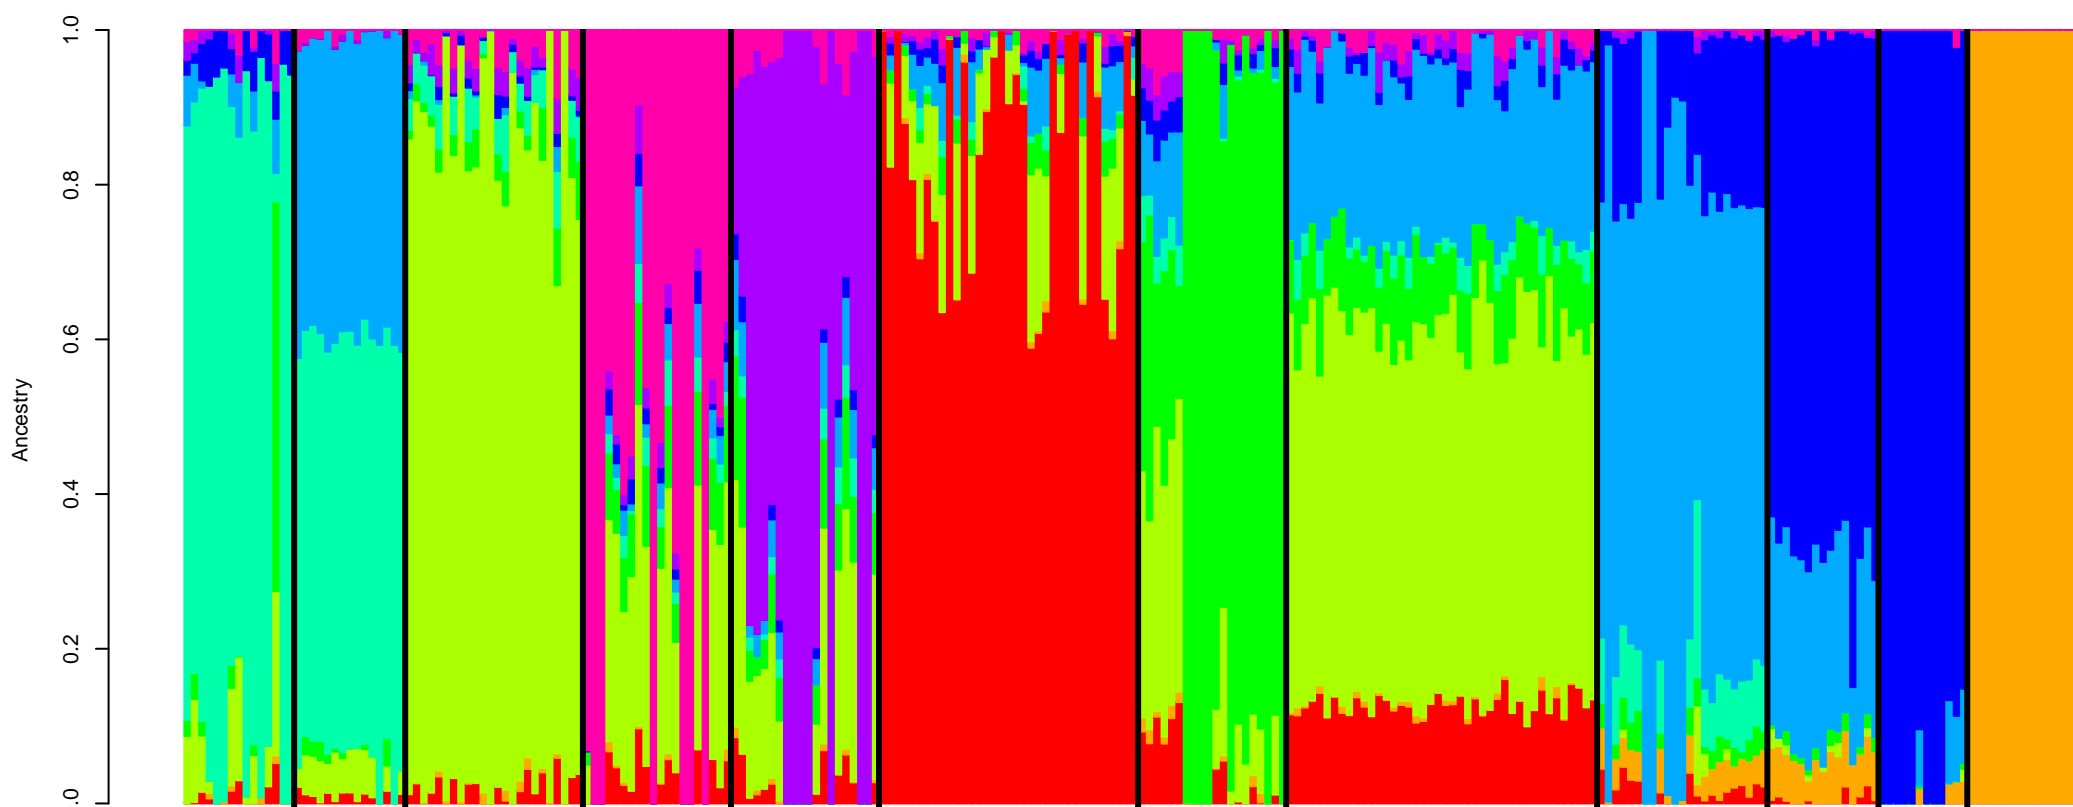

K= 10

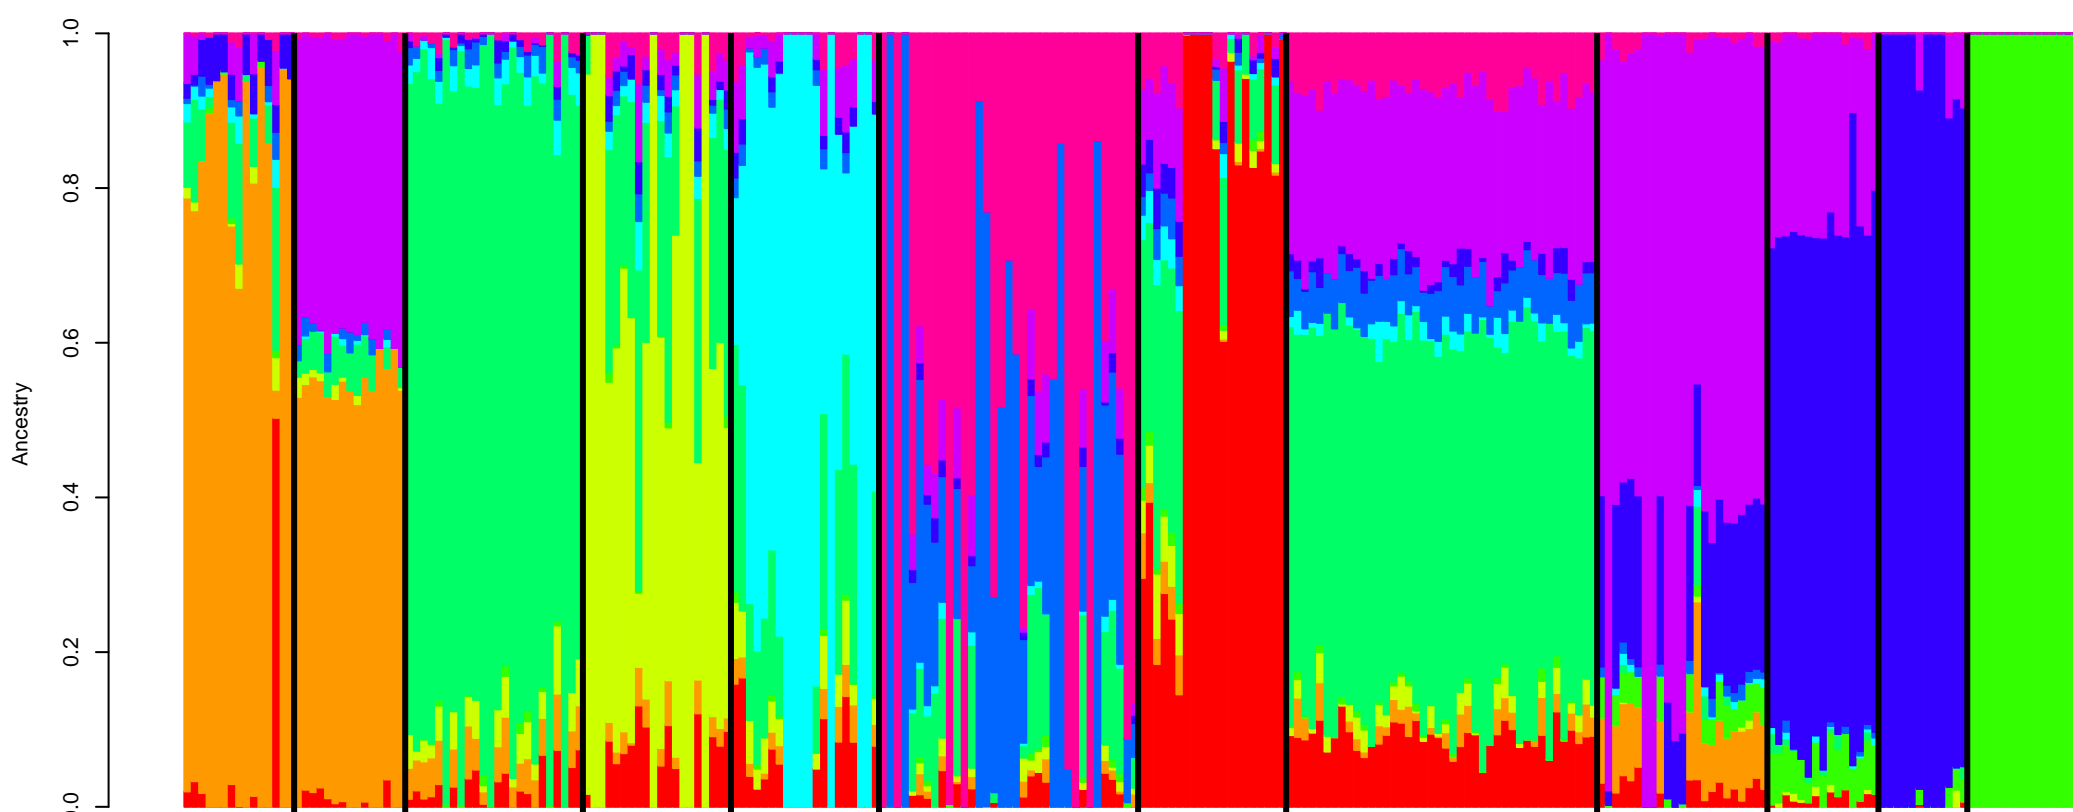

K= 11

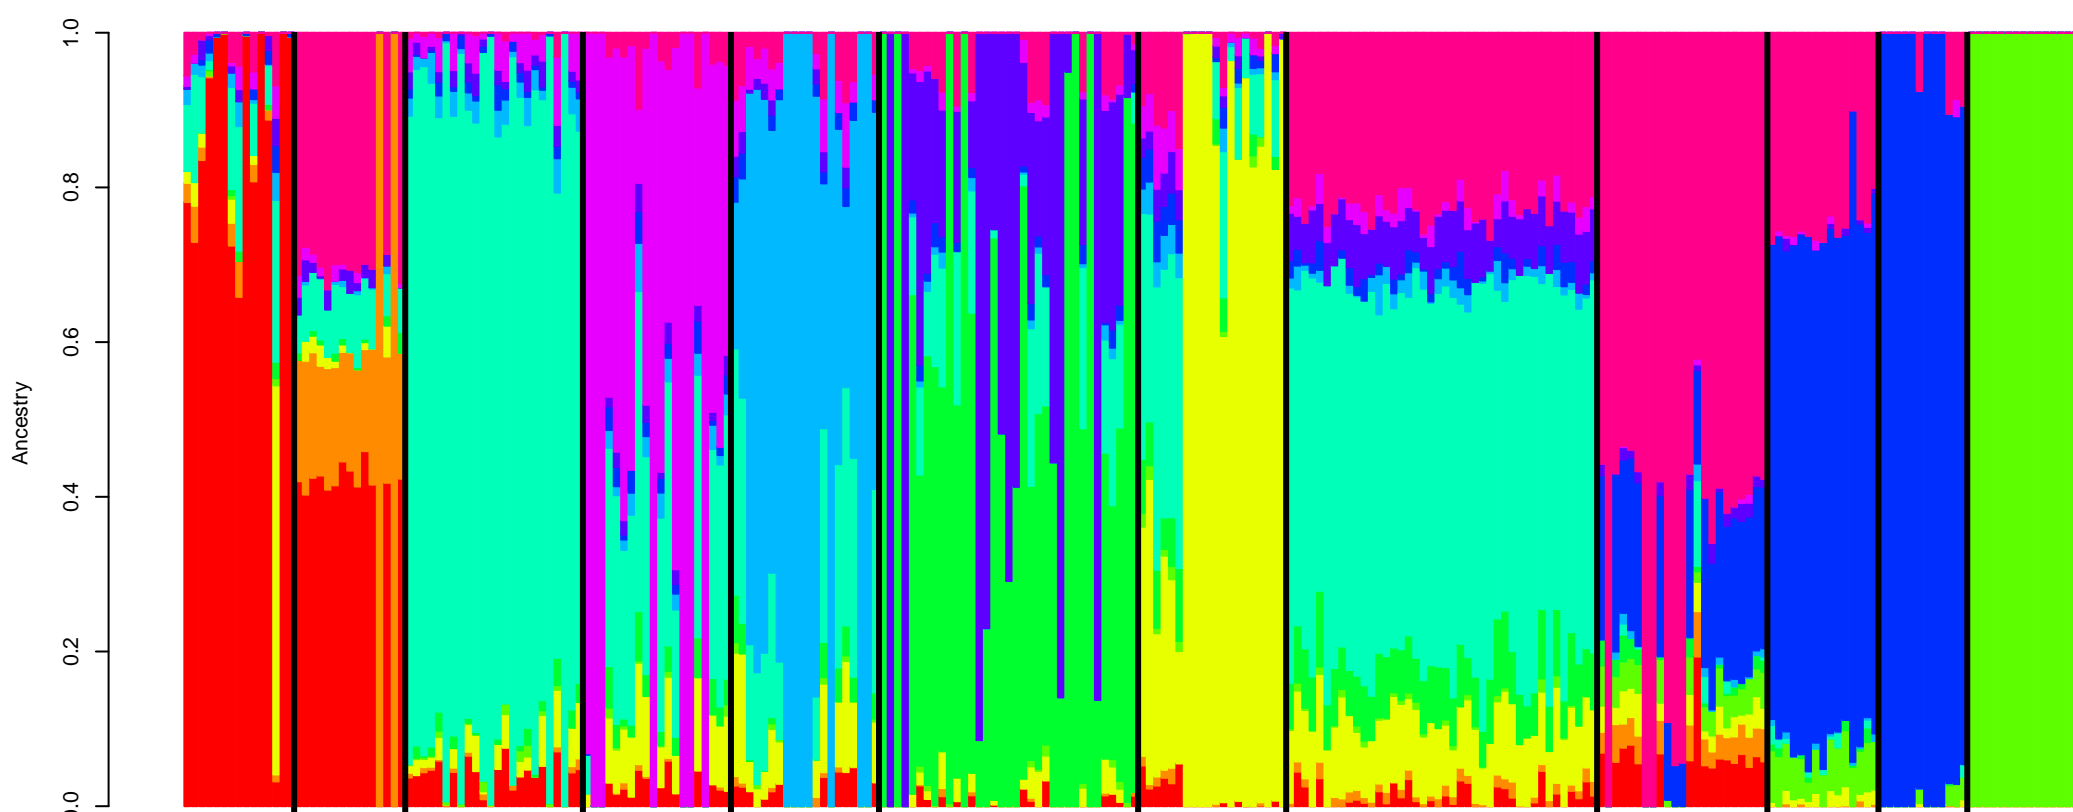

K= 12

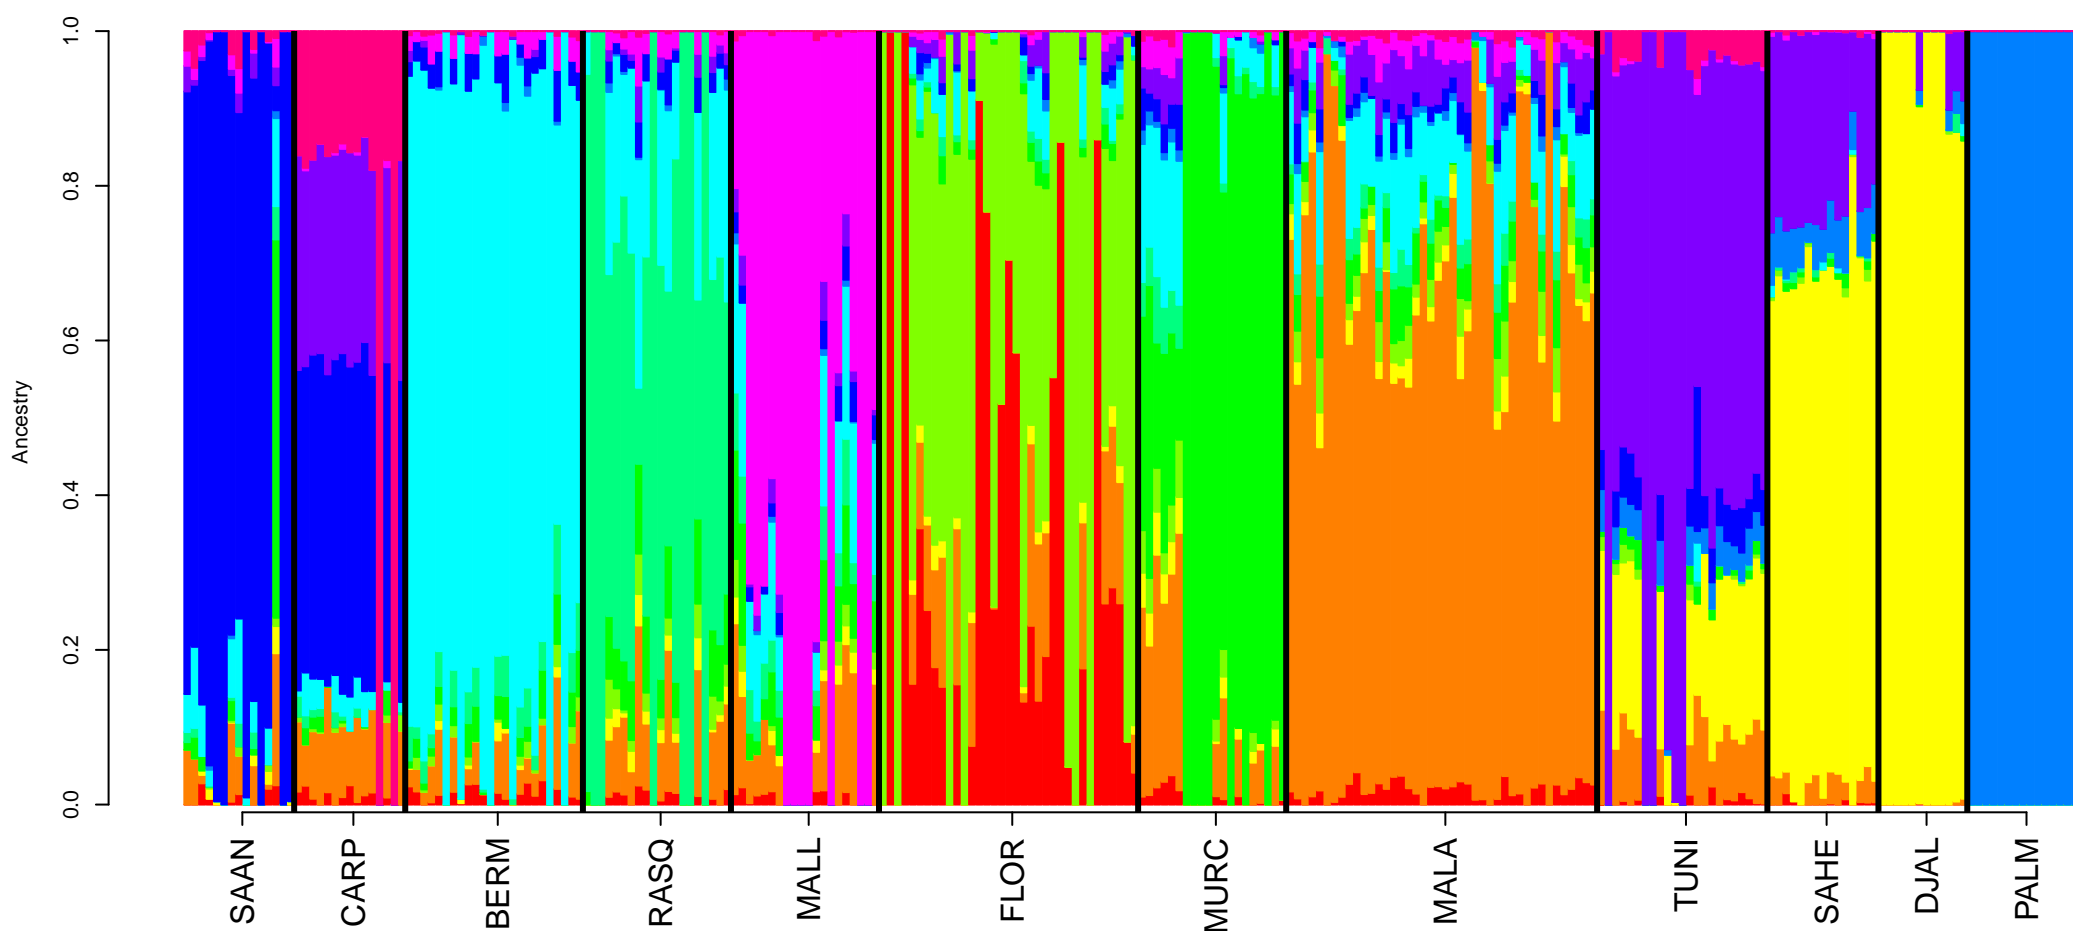

Supplement: 12711_2016_229_MOESM5_ESM.pdf [file 12711_2016_229_MOESM5_ESM.pdf]
